# Supplementary material
Source: ML conference proceedings conference paper supplement (https://openaccess.thecvf.com/content/ACCV2022/html/Panaetov__RDRN_Recursively_ACCV_2022_paper.html)
Supplement: Supplementary file 1 [file Panaetov__RDRN_Recursively_ACCV_2022_supplemental.pdf]

# RDRN: Recursively Defined Residual Network for Image Super-Resolution Supplementary Material

Alexander Panaetov<sup>1</sup>[0000–0003–2309–9798], Karim  
Elhadji Daou<sup>1</sup>[0000–0003–4677–7571], Igor Samenko<sup>1</sup>[0000–0001–9400–312X],  
Evgeny Tetin<sup>1</sup>[0000–0001–6878–8330], and Ilya Ivanov<sup>1</sup>[0000–0001–7919–5143]

Huawei, Moscow Research Center, Russia {panaetov.alexander1, karim.daou,  
samenko.igor, evgeny.tetin, ivanov.ilya1}@huawei.com

## 1 Results on Image SR ( $\times 8$ )

We show the comparison on classical image SR ( $\times 8$ , BI degradation) in Table 1.

**Table 1.** Quantitative results with BI degradation model. The best and second best results are highlighted in **bold** and underlined

| Methods      | Scale      | Set5         |               | Set14        |               | B100         |               | Urban100     |               | Manga109     |               |
|--------------|------------|--------------|---------------|--------------|---------------|--------------|---------------|--------------|---------------|--------------|---------------|
|              |            | PSNR         | SSIM          |
| Bicubic      | $\times 8$ | 24.40        | 0.6580        | 23.10        | 0.5660        | 23.67        | 0.5480        | 20.74        | 0.5160        | 21.47        | 0.6500        |
| SRCNN [3]    | $\times 8$ | 25.33        | 0.6900        | 23.76        | 0.5910        | 24.13        | 0.5660        | 21.29        | 0.5440        | 22.46        | 0.6950        |
| RCAN [8]     | $\times 8$ | 27.31        | <b>0.7878</b> | 25.23        | 0.6511        | 24.98        | <b>0.6058</b> | 23.00        | 0.6452        | 25.24        | 0.8029        |
| SAN [2]      | $\times 8$ | 27.22        | 0.7829        | 25.14        | 0.6476        | 24.88        | 0.6011        | 22.70        | 0.6314        | 24.85        | 0.7906        |
| DRLN [1]     | $\times 8$ | 27.36        | 0.7882        | 25.34        | 0.6531        | 25.01        | 0.6057        | 23.06        | 0.6471        | 25.29        | 0.8041        |
| HAN [6]      | $\times 8$ | 27.33        | 0.7884        | 25.24        | 0.6510        | 24.98        | 0.6059        | 22.98        | 0.6347        | 25.20        | 0.8000        |
| SwinIR [4]   | $\times 8$ | <b>27.55</b> | <u>0.7941</u> | <b>25.46</b> | <b>0.6568</b> | <u>25.04</u> | <b>0.6092</b> | <u>23.17</u> | <b>0.6547</b> | <u>25.55</u> | <b>0.8132</b> |
| RDRN(ours)   | $\times 8$ | <u>27.52</u> | <b>0.7953</b> | 25.40        | 0.6548        | <b>25.10</b> | 0.6084        | <b>23.20</b> | 0.6511        | <b>25.66</b> | 0.8114        |
| SwinIR+ [4]  | $\times 8$ | <u>27.58</u> | 0.7949        | <b>25.49</b> | <b>0.6579</b> | <u>25.06</u> | <b>0.6100</b> | <u>23.26</u> | <b>0.6575</b> | 25.66        | 0.8154        |
| RDRN+ (ours) | $\times 8$ | <b>27.65</b> | <b>0.7971</b> | 25.48        | 0.6573        | <b>25.15</b> | <b>0.6100</b> | <b>23.38</b> | 0.6568        | <b>25.93</b> | <b>0.8157</b> |

## 2 Additional Visual Comparison

We provide more visual comparison for  $\times 2$ ,  $\times 3$ ,  $\times 4$  SR with BI degradation model in Figures 1, 2, 3 and for  $\times 3$  SR with BD degradation model in Figure 4.

## 3 RDRB Implementation Details

To avoid any misunderstanding about the definition of the proposed RDRB, we provide PyTorch implementation of the basic block and the recursive step.

*PyTorch Implementation of recursively defined residual block*

```

class ConvAdaESA(nn.Module): # RDRB_0
    def __init__(self, channels):
        self.conv = conv(channels, channels, 3)
        self.esa = ESA(channels)
        self.act = activation('lrelu')
        self.norm = BatchNorm2d(channels)
        self.phi = conv(1, 1, 1)
        self.level = 0

    def forward(self, x):
        s = torch.std(x, dim=[1,2,3], keepdim=True)
        out = self.act(self.conv(self.norm(x))) # BN + Conv + Act
        out = out * torch.exp(self.phi(torch.log(s))) # AdaDM
        out = self.esa(out+x) # Skip + ESA
        return out

def build_RDRB(block):
    class RDRB_base(nn.Module):
        def __init__(self, channels):
            self.block1 = block(channels)
            self.block2 = block(channels)
            self.conv = conv(channels*2, channels, 1)
            self.esa = ESA(channels)
            self.act = activation('lrelu')
            self.level = self.block1.level + 1
            if self.level == 3:
                self.NLSA = NonLocalSparseAttention(channels=channels)

        def forward(self, x):
            out1 = self.block1(x)
            out2 = self.block2(out1)
            out = torch.cat([out1,out2],dim=1)
            out = self.conv(out) + x
            out = self.esa(self.act(out))
            if self.level == 3:
                out = self.NLSA(out)
            return out
    return RDRB_base

```



## 4 Results on DIV2K validation dataset

We show results for classical SR on validation DIV2K dataset in Table 2. We employ peak signal-to-noise ratio (PSNR) and structural similarity (SSIM) [7] to measure the quality of super-resolved images. All SR results are evaluated on RGB channels and on Y channel after color space transformation from RGB to YCbCr.

| Model | RDRN      |        |              |        | RDRN+     |        |              |        |
|-------|-----------|--------|--------------|--------|-----------|--------|--------------|--------|
|       | Y channel |        | RGB channels |        | Y channel |        | RGB channels |        |
|       | PSNR      | SSIM   | PSNR         | SSIM   | PSNR      | SSIM   | PSNR         | SSIM   |
| x2    | 36.98     | 0.9512 | 35.47        | 0.9437 | 37.03     | 0.9515 | 35.52        | 0.9440 |
| x3    | 33.16     | 0.8985 | 31.70        | 0.8855 | 33.22     | 0.8992 | 31.76        | 0.8864 |
| x4    | 31.11     | 0.8515 | 29.66        | 0.8344 | 31.17     | 0.8525 | 29.73        | 0.8354 |
| x8    | 27.32     | 0.7333 | 25.89        | 0.7059 | 27.42     | 0.7356 | 25.99        | 0.7083 |

**Table 2.** Quantitative results of SR with BI degradation model on DIV2K validation dataset.

## References

1. Anwar, S., Barnes, N.: Densely residual laplacian super-resolution. *IEEE Transactions on Pattern Analysis and Machine Intelligence (TPAMI)* (2020)
2. Dai, T., Cai, J., Zhang, Y., Xia, S.T., Zhang, L.: Second-order attention network for single image super-resolution. In: *CVPR* (2019)
3. Dong, C., Loy, C.C., He, K., Tang, X.: Learning a deep convolutional network for image super-resolution. In: *ECCV* (2014)
4. Liang, J., Cao, J., Sun, G., Zhang, K., Gool, L.V., Timofte, R.: Swinir: Image restoration using swin transformer. *arXiv preprint arXiv:2108.10257* (2021)
5. Liu, J., Zhang, W., Tang, Y., Tang, J., Wu, G.: Residual feature aggregation network for image super-resolution. In: *CVPR*. pp. 2356–2365. *IEEE* (2020)
6. Niu, B., Wen, W., Ren, W., Zhang, X., Yang, L., Wang, S., Zhang, K., Cao, X., Shen, H.: Single image super-resolution via a holistic attention network. In: *ECCV* (12). *Lecture Notes in Computer Science*, vol. 12357, pp. 191–207. *Springer* (2020)
7. Wang, Z., Bovik, A.C., Sheikh, H.R., Simoncelli, E.P.: Image quality assessment: from error visibility to structural similarity. *IEEE Trans. Image Processing* **13**(4), 600–612 (2004)
8. Zhang, Y., Li, K., Li, K., Wang, L., Zhong, B., Fu, Y.: Image super-resolution using very deep residual channel attention networks. In: *ECCV* (2018)
9. Zhang, Y., Tian, Y., Kong, Y., Zhong, B., Fu, Y.: Residual dense network for image super-resolution. In: *CVPR* (2018)

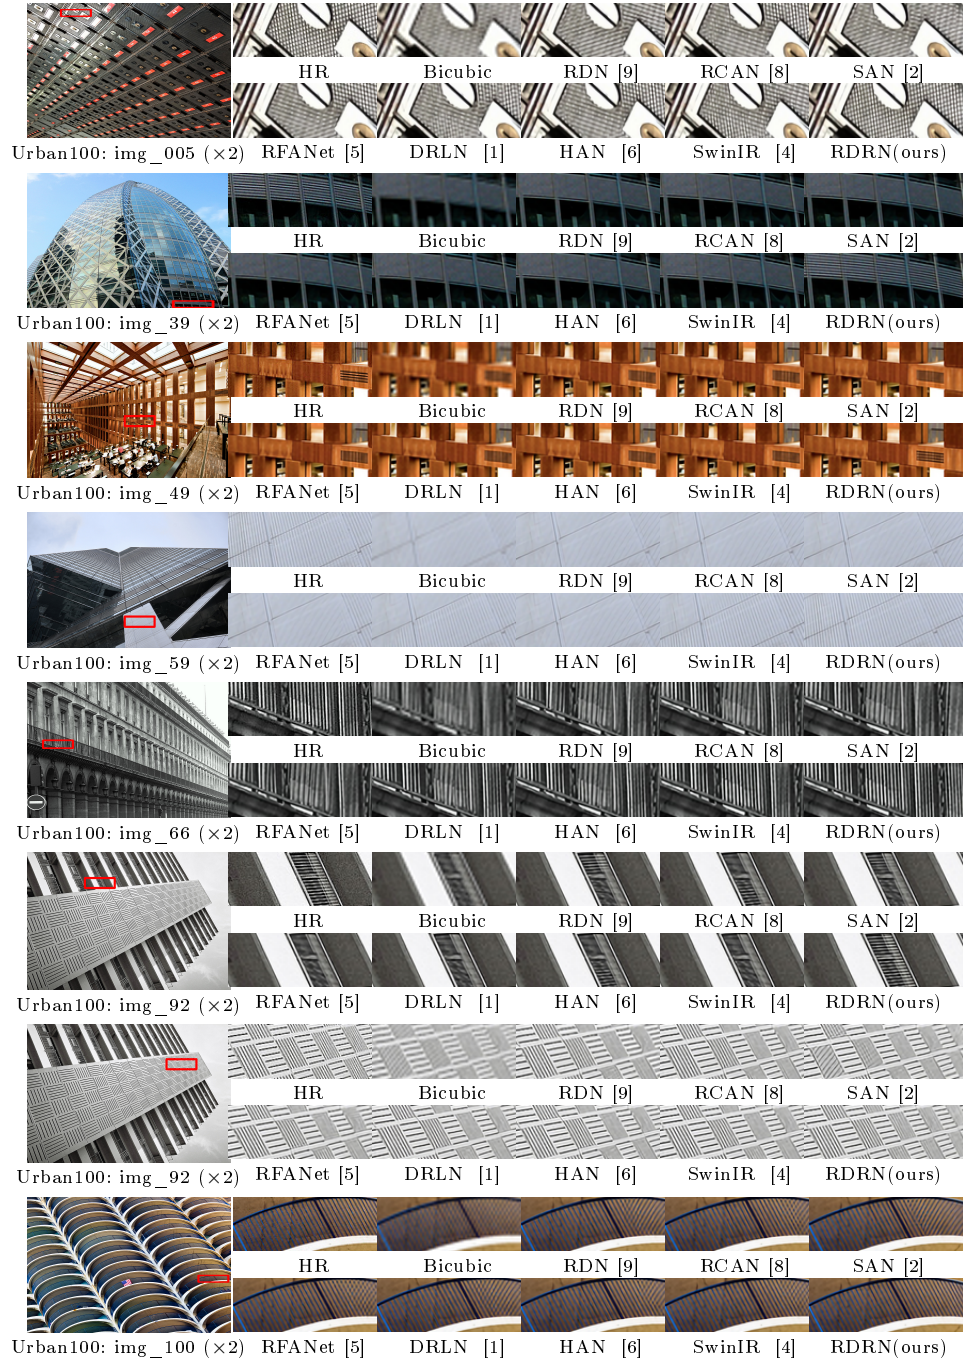Fig. 1. Visual comparison for  $2\times$  SR with BI model.

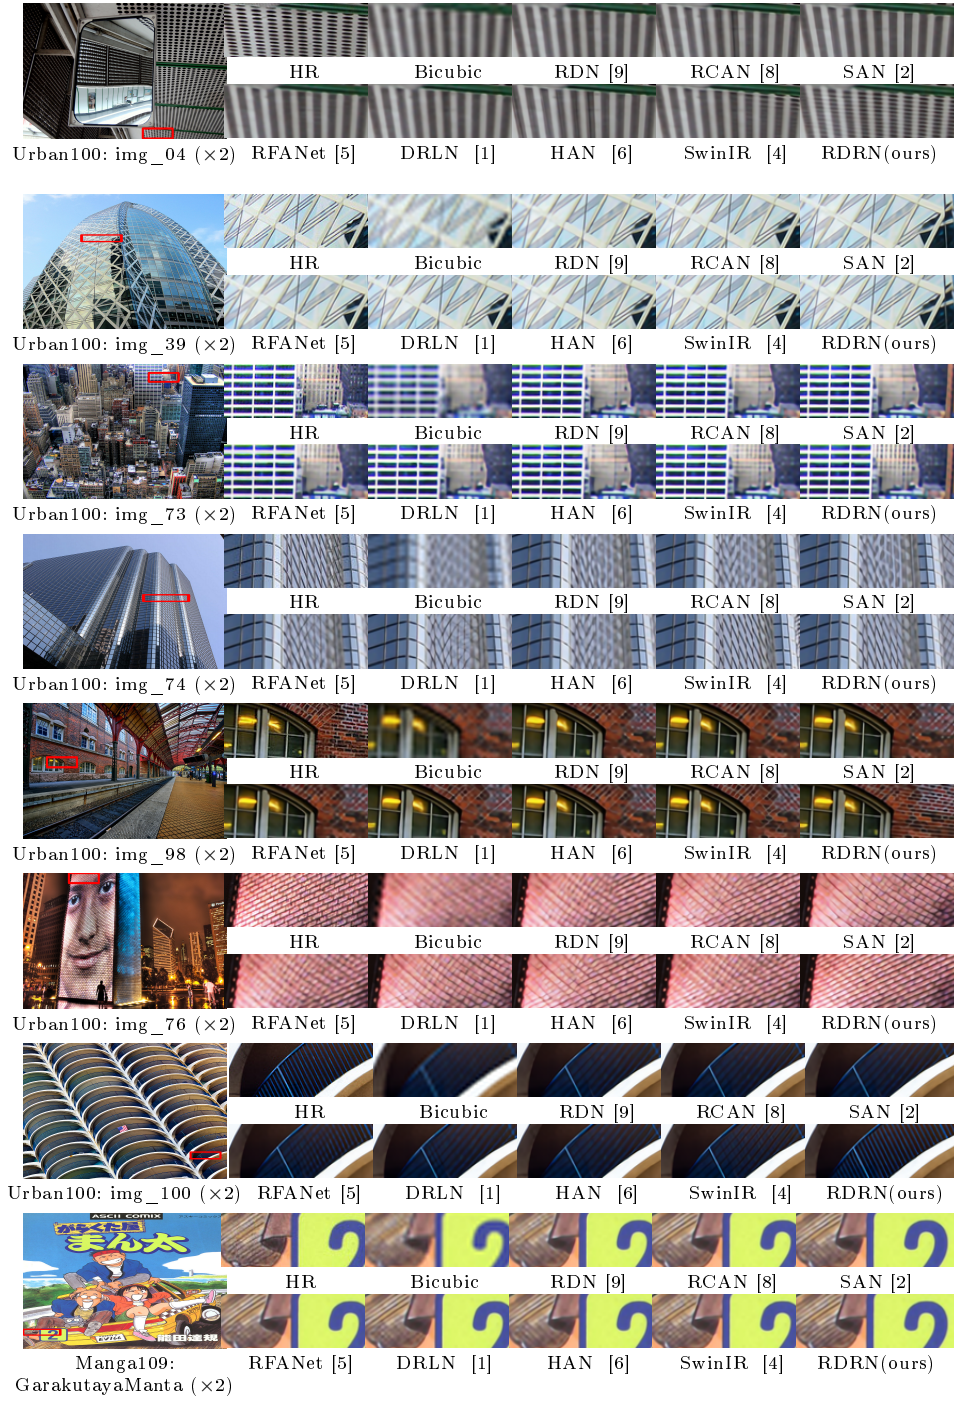Fig. 2. Visual comparison for  $3\times$  SR with BI model.



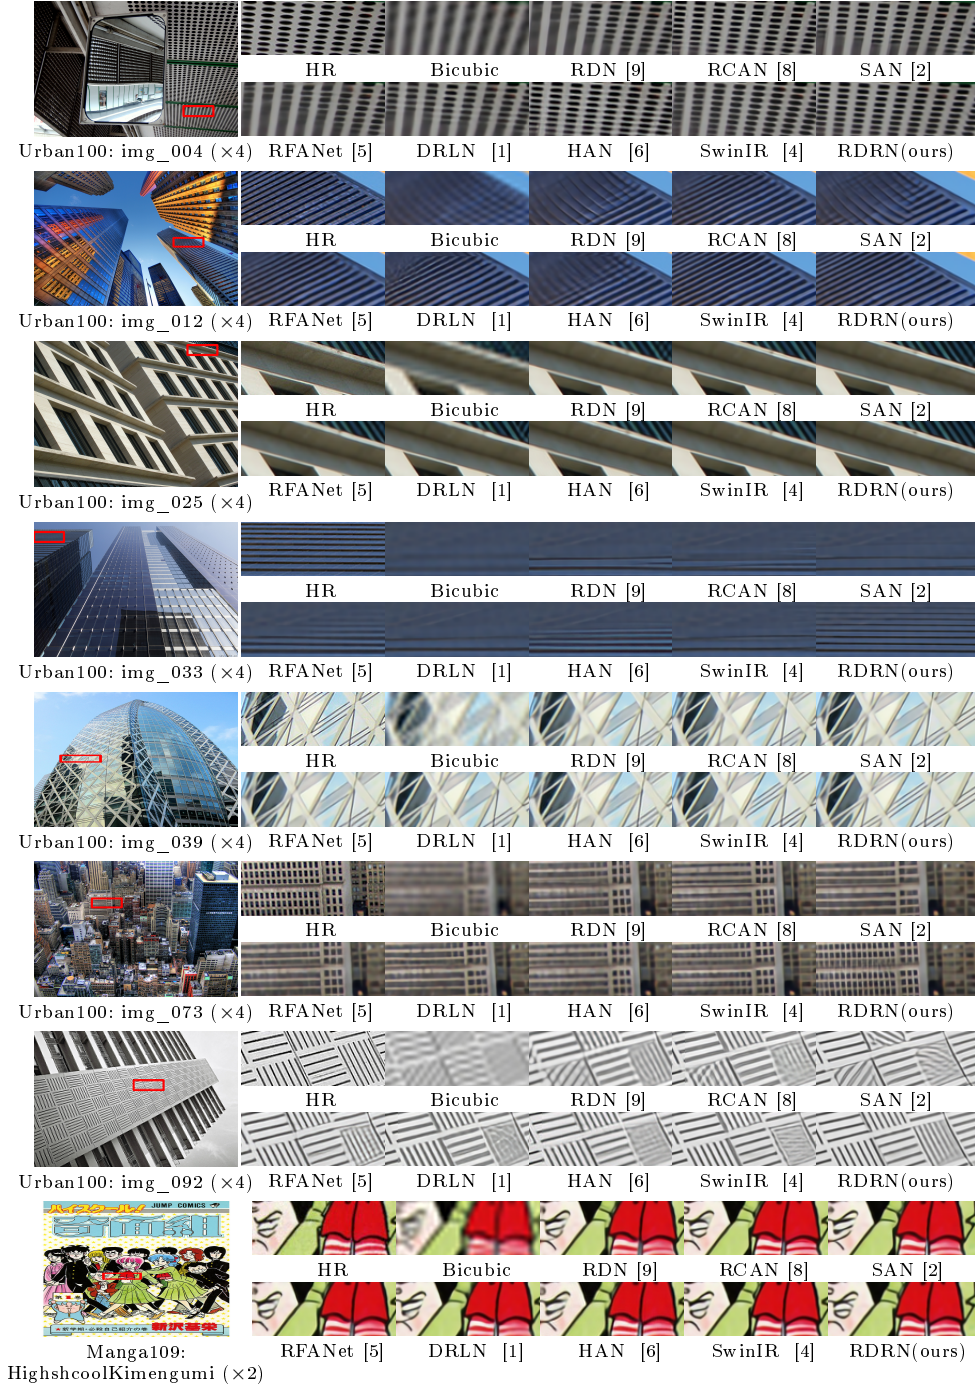Fig. 3. Visual comparison for  $4\times$  SR with BI model.

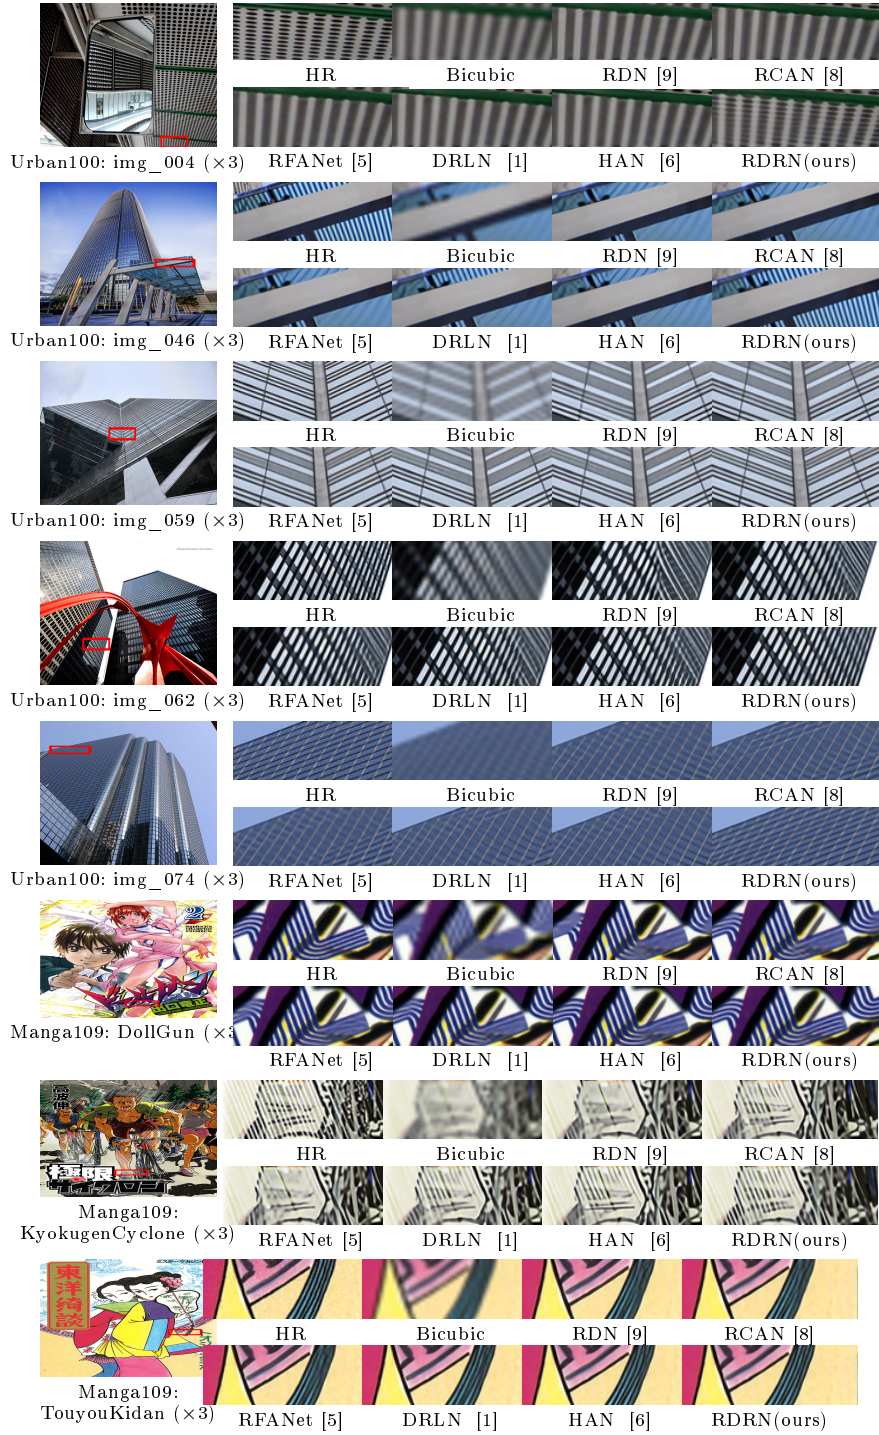Fig. 4. Visual comparison for  $3\times$  SR with BD model.
